# Supplementary material
Source: PubMed Central journal article supplement (PMC4409156)

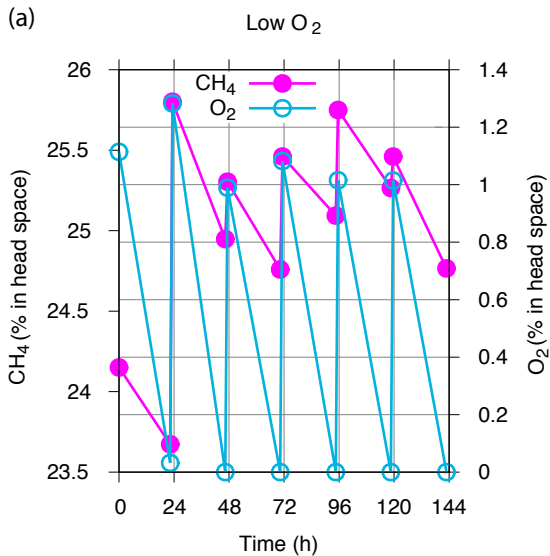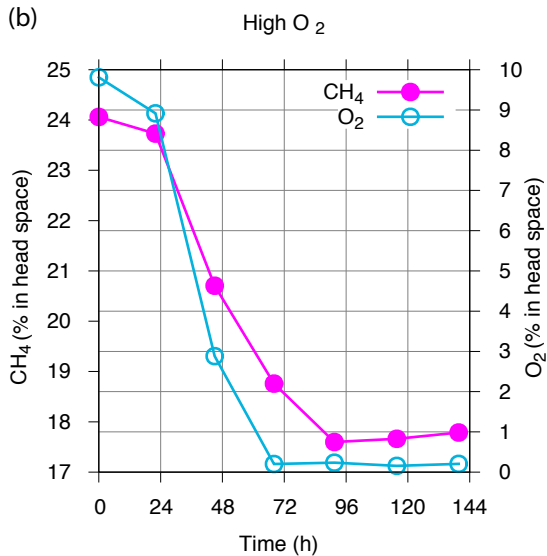

Supplement: ismej2014203x3.pdf [file ismej2014203x3.pdf]

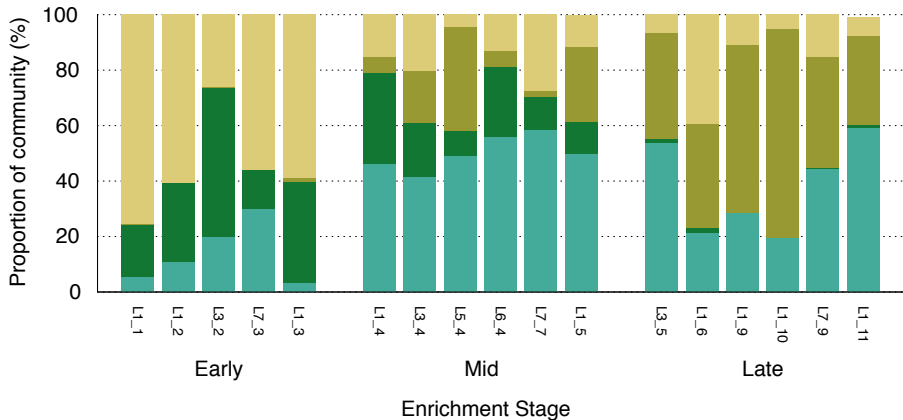

*Methylobacter*

*Methylobacter* Type 301

*Methylobacter* Type 13

Other

Supplement: ismej2014203x7.pdf [file ismej2014203x7.pdf]

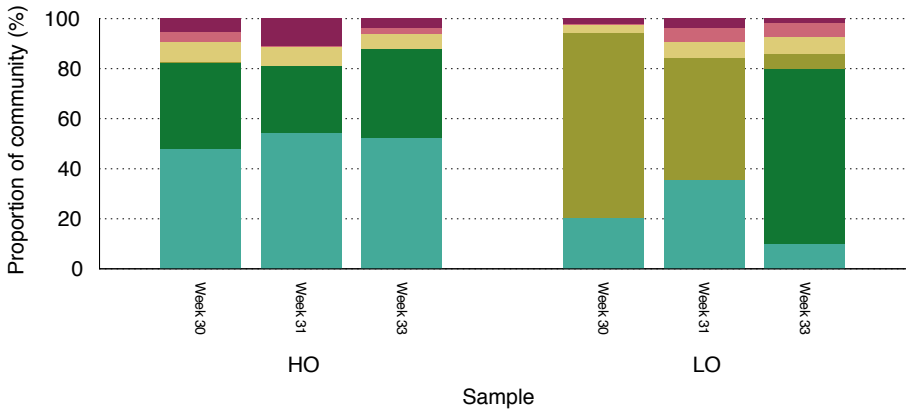

*Methylobacter*  
*Methylophilus*  
*Methylostenella*

*Flavobacterium*  
*Acidovorax*  
Other

Supplement: ismej2014203x8.pdf [file ismej2014203x8.pdf]

(a)

T449DRAFT\_scf718000000004\_quiver.1

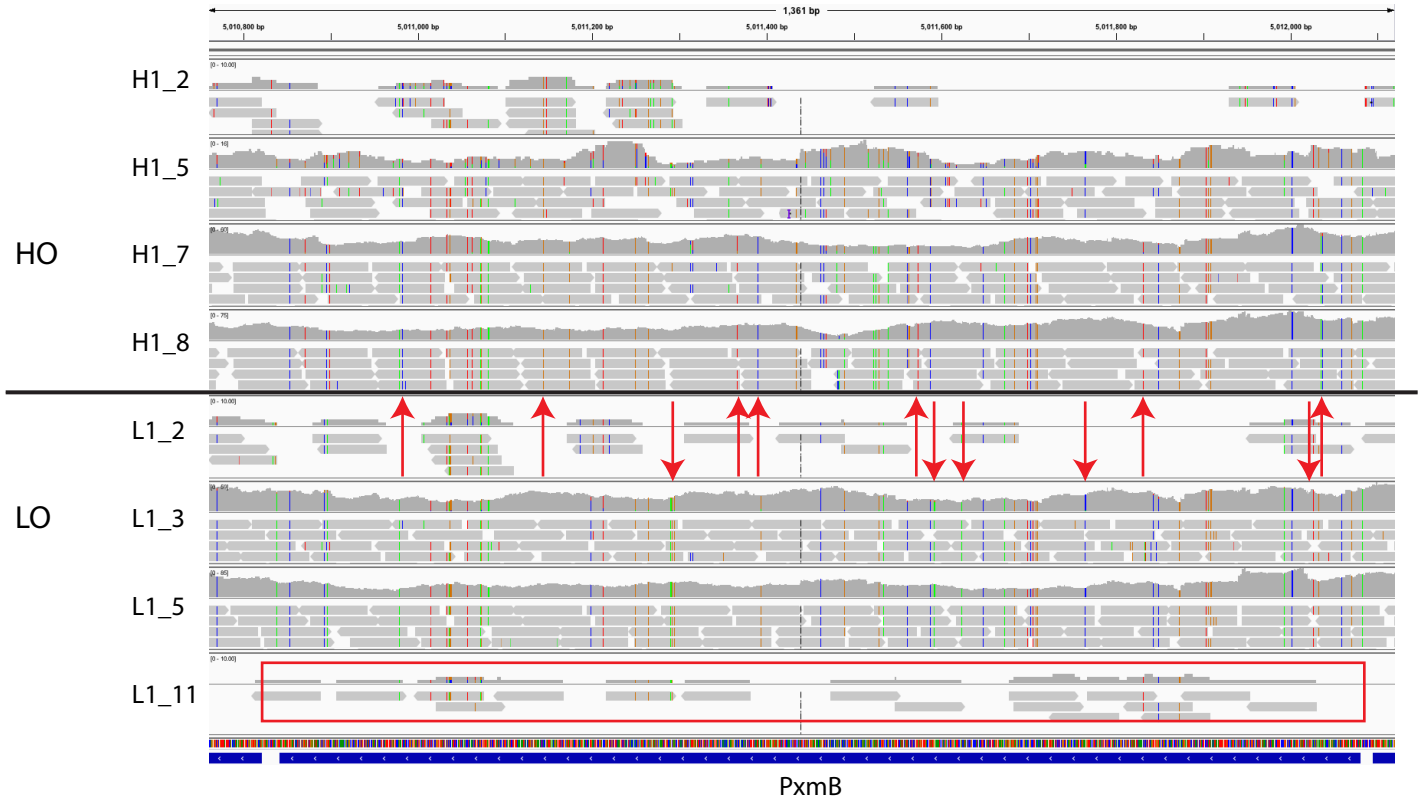

(b)

T449DRAFT\_scf718000000004\_quiver.1

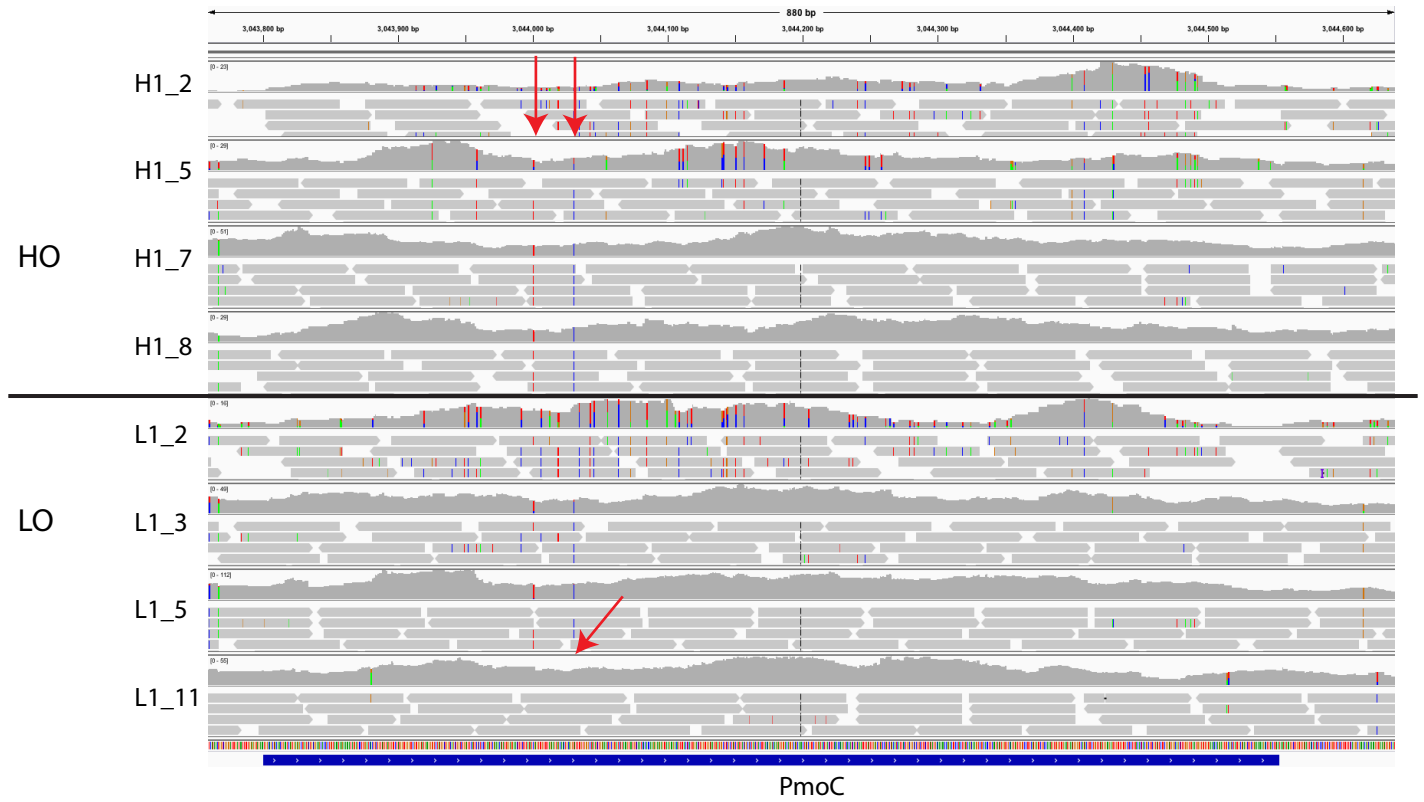

Supplement: ismej2014203x9.pdf [file ismej2014203x9.pdf]
